# Supplementary material for: Transplantation of hESC-derived hepatocytes protects mice from liver injury
Source: PubMed Central journal article supplement (PMC4676869; doi:10.1186/s13287-015-0227-6), 2015-12-12
Supplement: 13287_2015_227_MOESM2_ESM.pdf [file 13287_2015_227_MOESM2_ESM.pdf]

## Supplementary Table 2

### Primers used for RT-PCR of Human mRNAs

| Gene           | Direction | Primer sequence 5' → 3'    | Annealing temperature, °C | Amplicon size, bp |
|----------------|-----------|----------------------------|---------------------------|-------------------|
| <i>HNF4α</i>   | Forward   | CGGGTGTCCATACGCATCCTTG     | 60                        | 347               |
|                | Reverse   | GACCCTCCCAGCAGCATCTCCT     |                           |                   |
| <i>AFP</i>     | Forward   | AGCTTGGTGGTGGATGAAAC       | 58                        | 248               |
|                | Reverse   | CCCTCTTCAGCAAAGCAGAC       |                           |                   |
| <i>ALB</i>     | Forward   | CCTTTGGCACAATGAAGTGGGTAACC | 58                        | 354               |
|                | Reverse   | CAGCAGTCAGCCATTCACCATAGG   |                           |                   |
| <i>FOXM1B</i>  | Forward   | GGGCGCACGGCGGAAGATGAA      | 63                        | 493               |
|                | Reverse   | CCACTCTTCCAAGGGAGGGCTC     |                           |                   |
| <i>LDLR</i>    | Forward   | GGGCTGGAAATTGCGCTGGACCGTC  | 60                        | 374               |
|                | Reverse   | TCACAGACGAACTGCCGAGAGATGC  |                           |                   |
| <i>β-ACTIN</i> | Forward   | GCACTCTTCCAGCCTTCCTTCC     | 60                        | 521               |
|                | Reverse   | CTGCTGTCACCTTCACCGTTCC     |                           |                   |

**Primers used for qRT-PCR of Human mRNAs**

| <b>Gene</b>                     | <b>Direction</b> | <b>Primer sequence 5' → 3'</b> |
|---------------------------------|------------------|--------------------------------|
| <i>OCT-4</i>                    | Forward          | GGTATTCAGCCAAACGACCA           |
|                                 | Reverse          | TTGCCTCTCACTCGGTTCTC           |
| <i>HNF-4<math>\alpha</math></i> | Forward          | GCCTACCTCAAAGCCATCAT           |
|                                 | Reverse          | GACCCTCCCAGCAGCATC TC          |
| <i>ALBUMIN</i>                  | Forward          | TGAGAAAACGCCAGTAAGTGAC         |
|                                 | Reverse          | TGCGAAATCATCCATAACAGC          |
| <i>OTC</i>                      | Forward          | GCTGATTACCTCACGCTCCA           |
|                                 | Reverse          | TGGTTACACTAGCATCCGGC           |
| <i>MRP</i>                      | Forward          | GCCGGTGGTCAGATTATCAT           |
|                                 | Reverse          | GATCTTGGATTTCCGAAGCA           |
| <i>UGT1A1</i>                   | Forward          | AGACGTACCCTGTGCCATTC           |
|                                 | Reverse          | CCGTCAGCATGACATCAAAG           |
| <i>UGT2B7</i>                   | Forward          | TCAGCTTCTCTCCTGGCTACTT         |
|                                 | Reverse          | ACGTCAGCTTTCCCCATTGTCTCAG      |

---

|                |         |                                |
|----------------|---------|--------------------------------|
| <i>CYP1A2</i>  | Forward | AACAAGGGACACAACGCTGAAT         |
|                | Reverse | GGAAGAGAAACAAGGGCTGAGT         |
| <i>CYP2C9</i>  | Forward | CCTCTGGGGCATTATCCATC           |
|                | Reverse | ATATTTGCACAGTGAAACATAGGA       |
| <i>CYP2C19</i> | Forward | TTCATGCCTTTCTCAGCAGG           |
|                | Reverse | ACAGATAGTGAAATTTGGAC           |
| <i>CYP3A4</i>  | Forward | CCTTACATATACACACCCTTTGGAAGT    |
|                | Reverse | AGCTCAATGCATGTACAGAATCCCCGGTTA |

---
