# Supplementary material for: Transplantation of hESC-derived hepatocytes protects mice from liver injury
Source: Springer Nature journal article supplement (doi:10.1186/s13287-015-0227-6), 2015-12-01
Supplement: MOESM1 [file 13287_2015_227_MOESM1_ESM.pdf]

**Supplementary Table 1 Antibodies used in this study**

| <b>Antibody</b>    | <b>Company</b>    | <b>Reference number</b> | <b>Dilution</b> |
|--------------------|-------------------|-------------------------|-----------------|
| Primary            |                   |                         |                 |
| OCT4               | Santa Cruz        | SC-5279                 | 1:200           |
| NANOG              | R&D               | AF1997                  | 1:100           |
| TRA-1-60           | Millipore         | MAB4360                 | 1:150           |
| GATA4              | Santa Cruz        | SC-1237                 | 1:200           |
| SOX17              | R&D               | MAB1924                 | 1:150           |
| FOXA2              | Santa Cruz        | SC-6554                 | 1:100           |
| HNF4 $\alpha$      | Santa Cruz        | SC-8987                 | 1:200           |
| CK19               | Dako              | M0888                   | 1:200           |
| HNF6               | Santa Cruz        | SC-13050                | 1:200           |
| HNF1 $\alpha$      | Santa Cruz        | SC-135939               | 1:200           |
| EPCAM              | AbCys             | ABC171                  | 1:200           |
| AFP                | Santa Cruz        | SC-8399                 | 1:200           |
| ALB                | Cedarlane         | CL2531A                 | 1:200           |
| CYP3A4             | Santa Cruz        | SC-27639                | 1:100           |
| A1AT               | Dako              | A0012                   | 1:400           |
| CLDN1              | Life Technologies | 187362                  | 1:200           |
| CD81               | BD Pharmingen     | 555675                  | 1:200           |
| SRB1               | Novus Biologicals | NB400-131               | 1:100           |
| OPN                | Santa Cruz        | SC-21742                | 1:200           |
| HNF1 $\beta$       | Santa Cruz        | SC-7411                 | 1:200           |
| CK7                | Dako              | M7018                   | 1:200           |
| CK18               | Chemicon          | CBL185                  | 1:100           |
| CFTR               | AbCam             | AB2784                  | 1:500           |
| Secondary          |                   |                         |                 |
| Donkey anti-goat   | Molecular Probes  | A11055 - A11057         | 1:1000          |
| Donkey anti-rabbit | Molecular Probes  | A32306 - A10042         | 1:1000          |
| Donkey anti-mouse  | Molecular Probes  | A21202 - A10037         | 1:1000          |
